# Supplementary material for: Free and Total Amino Acids in Human Milk in Relation to Maternal and Infant Characteristics and Infant Health Outcomes: The Ulm SPATZ Health Study
Source: MDPI journal article supplement (doi:10.3390/nu13062009), 2021-06-10
Supplement: s1 [file s1]

## Supplementary Materials

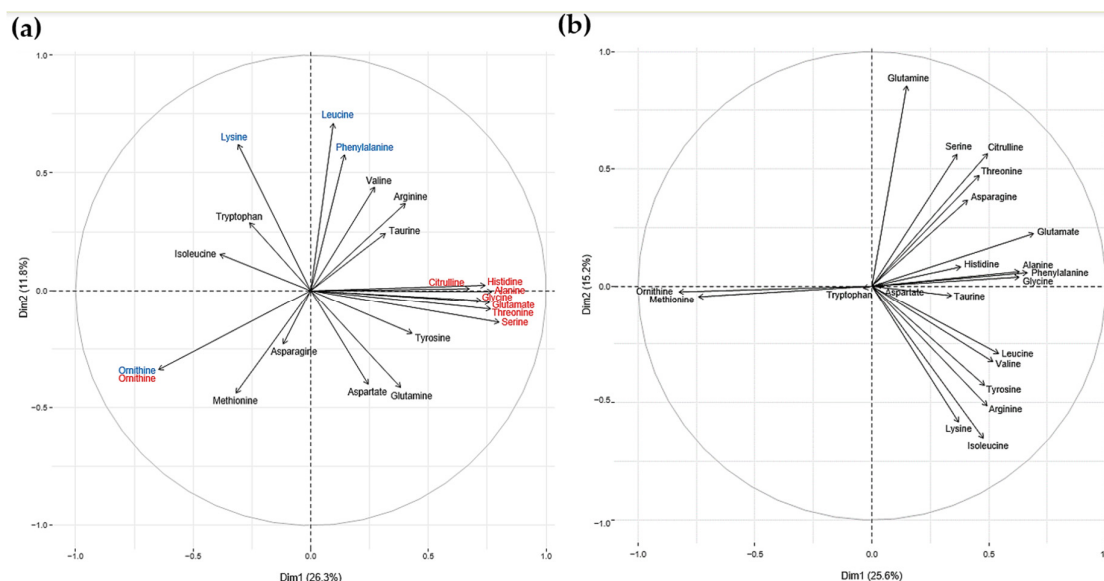

**Figure S1.** Compositional biplots from principal component analysis of free amino acid (FAA) levels in 6-week human milk (HM) (a) and 6-month HM (b). Potential patterns of FAAs as revealed by factor analyses are colored (red or blue).

**Table S1.** Free amino acid patterns in 6-week human milk obtained from factor analyses.

| FAA                             | Factors loadings |          |
|---------------------------------|------------------|----------|
|                                 | Factor 1         | Factor 2 |
| <b>EAAs</b>                     |                  |          |
| Histidine                       | 0.64             | -        |
| Isoleucine                      | -                | -        |
| Leucine                         | -                | 0.75     |
| Lysine                          | -                | 0.51     |
| Methionine                      | -                | -        |
| Phenylalanine                   | -                | 0.59     |
| Threonine                       | 0.76             | -        |
| Tryptophan                      | -                | -        |
| Valine                          | -                | -        |
| <b>NEAAs/conditionally EAAs</b> |                  |          |
| Alanine                         | 0.66             | -        |
| Arginine                        | -                | -        |
| Asparagine                      | -                | -        |
| Aspartate                       | -                | -        |

|                      |       |       |
|----------------------|-------|-------|
| <b>Glutamate</b>     | 0.68  | -     |
| <b>Glutamine</b>     | -     | -     |
| <b>Glycine</b>       | 0.66  | -     |
| <b>Serine</b>        | 0.83  | -     |
| <b>Tyrosine</b>      | -     | -     |
| <b>Non-coded AAs</b> |       |       |
| <b>Citrulline</b>    | 0.58  | -     |
| <b>Ornithine</b>     | -0.54 | -0.56 |
| <b>Taurine</b>       | -     | -     |

FAA: free amino acid; EAA: essential amino acid; NEAA: non-essential amino acid; AA: amino acid; HM: human milk. Values are factor loadings from principal component analysis. Only loadings < -0.50 and > 0.50 are shown.

**Table S2A.** Levels of free amino acids in human milk for boys and girls.

| FAA (μmol/L)             | 6 weeks<br>Mean (SD) |                | 6 months<br>Mean (SD) |                | Analysis of<br>differences<br>at 6 weeks<br>( <i>p</i> -value) | Analysis of<br>differences<br>at 6 months<br>( <i>p</i> -value) |
|--------------------------|----------------------|----------------|-----------------------|----------------|----------------------------------------------------------------|-----------------------------------------------------------------|
|                          | HM for boys          | HM for girls   | HM for boys           | HM for girls   |                                                                |                                                                 |
|                          | (n = 354)            | (n = 317)      | (n = 232)             | (n = 209)      |                                                                |                                                                 |
| EAAs                     |                      |                |                       |                |                                                                |                                                                 |
| Histidine                | 28.4 (9.3)           | 28.1 (8.9)     | 29.6 (14.6)           | 29.9 (13.2)    | 0.661                                                          | 0.397                                                           |
| Isoleucine               | 16.7 (10.5)          | 16.2 (10.1)    | 12.6 (6.4)            | 12.9 (5.3)     | 0.624                                                          | 0.136                                                           |
| Leucine                  | 33.7 (16.6)          | 34.2 (19.1)    | 34.0 (12.0)           | 35.8 (10.8)    | 0.930                                                          | 0.038                                                           |
| Lysine                   | 35.1 (25.2)          | 34.6 (22.8)    | 29.9 (16.3)           | 30.5 (13.6)    | 0.708                                                          | 0.104                                                           |
| Methionine               | 27.7 (23.9)          | 28.0 (24.6)    | 33.8 (26.9)           | 35.5 (27.6)    | 0.875                                                          | 0.588                                                           |
| Phenylalanine            | 21.7 (10.0)          | 21.0 (10.2)    | 16.5 (6.1)            | 16.4 (5.0)     | 0.283                                                          | 0.829                                                           |
| Threonine                | 71.2 (29.7)          | 70.9 (29.0)    | 94.8 (38.0)           | 99.6 (36.3)    | 0.863                                                          | 0.081                                                           |
| Tryptophan               | 14.3 (7.4)           | 14.9 (7.6)     | 28.6 (11.8)           | 29.5 (11.8)    | 0.381                                                          | 0.227                                                           |
| Valine                   | 110.4 (58.1)         | 109.0 (58.4)   | 65.4 (26.0)           | 68.1 (28.9)    | 0.710                                                          | 0.277                                                           |
| NEAAs/conditionally EAAs |                      |                |                       |                |                                                                |                                                                 |
| Alanine                  | 233.8 (65.1)         | 229.3 (64.5)   | 241.2 (75.0)          | 244.5 (69.0)   | 0.348                                                          | 0.391                                                           |
| Arginine                 | 17.0 (12.0)          | 17.1 (10.5)    | 16.9 (6.9)            | 17.2 (5.8)     | 0.468                                                          | 0.169                                                           |
| Asparagine               | 25.6 (14.9)          | 24.3 (15.0)    | 17.4 (7.7)            | 18.0 (9.5)     | 0.153                                                          | 0.998                                                           |
| Aspartate                | 31.1 (18.0)          | 30.6 (18.4)    | 63.8 (37.3)           | 66.9 (40.9)    | 0.551                                                          | 0.537                                                           |
| Glutamate                | 1326.8 (415.7)       | 1284.9 (403.7) | 1498.3 (320.6)        | 1565.3 (334.3) | 0.196                                                          | 0.023                                                           |
| Glutamine                | 244.0 (160.2)        | 233.5 (162.0)  | 547.9 (258.4)         | 549.2 (280.0)  | 0.244                                                          | 0.713                                                           |
| Glycine                  | 138.9 (41.3)         | 139.3 (39.5)   | 143.8 (49.9)          | 149.1 (47.0)   | 0.792                                                          | 0.072                                                           |



|                      |             |             |            |            |       |       |
|----------------------|-------------|-------------|------------|------------|-------|-------|
| All TAAs<br>(mmol/L) | 74.8 (12.2) | 73.5 (11.3) | 57.7 (8.7) | 58.6 (9.2) | 0.129 | 0.435 |
|----------------------|-------------|-------------|------------|------------|-------|-------|

TAA: total amino acid; Glx: glutamate + glutamine; Asx: aspartate + asparagine; HM: human milk. ‡  
 $p < 0.01$ . Bonferroni-adjusted level of statistical significance is  $\alpha = 0.05/16 = 0.003$ .

Table S3A. Spearman correlation coefficients between free amino acids in human milk and maternal anthropometrics.

| FAA                      | Maternal anthropometrics |                           |                              |                              |                         |                          |                              |                              |
|--------------------------|--------------------------|---------------------------|------------------------------|------------------------------|-------------------------|--------------------------|------------------------------|------------------------------|
|                          | Age                      |                           | Weight                       |                              | Height                  |                          | BMI                          |                              |
|                          | 6 weeks<br>Rho (95% CI)  | 6 months<br>Rho (95% CI)  | 6 weeks<br>Rho (95% CI)      | 6 months<br>Rho (95% CI)     | 6 weeks<br>Rho (95% CI) | 6 months<br>Rho (95% CI) | 6 weeks<br>Rho (95% CI)      | 6 months<br>Rho (95% CI)     |
| EAAs                     |                          |                           |                              |                              |                         |                          |                              |                              |
| Histidine                | -0.02 (-0.09; 0.06)      | 0.00 (-0.09; 0.10)        | -0.03 (-0.10; 0.05)          | -0.04 (-0.13; 0.06)          | 0.02 (-0.06; 0.09)      | -0.02 (-0.11; 0.07)      | -0.03 (-0.11; 0.04)          | -0.03 (-0.12; 0.07)          |
| Isoleucine               | -0.11 (-0.18; -0.03)‡    | -0.02 (-0.11; 0.08)       | 0.01 (-0.07; 0.09)           | 0.09 (-0.01; 0.18)           | -0.05 (-0.12; 0.03)     | -0.05 (-0.14; 0.05)      | 0.08 (-0.01; 0.16)           | 0.12 (0.03; 0.21)‡           |
| Leucine                  | -0.04 (-0.12; 0.03)      | 0.01 (-0.08; 0.10)        | 0.03 (-0.04; 0.11)           | 0.06 (-0.04; 0.15)           | -0.09 (-0.17; -0.02)    | -0.01 (-0.10; 0.09)      | 0.11 (0.04; 0.19)‡           | 0.09 (-0.01; 0.18)           |
| Lysine                   | -0.03 (-0.11; 0.05)      | 0.06 (-0.04; 0.15)        | -0.04 (-0.12; 0.03)          | 0.06 (-0.03; 0.15)           | -0.11 (-0.18; -0.04)‡   | -0.02 (-0.12; 0.07)      | 0.01 (-0.07; 0.09)           | 0.05 (-0.03; 0.13)           |
| Methionine               | 0.02 (-0.06; 0.09)       | 0.09 (0.00; 0.19)         | -0.03 (-0.10; 0.05)          | 0.00 (-0.09; 0.10)           | -0.03 (-0.11; 0.04)     | 0.00 (-0.09; 0.10)       | -0.01 (-0.09; 0.07)          | 0.01 (-0.08; 0.11)           |
| Phenylalanine            | 0.03 (-0.04; 0.11)       | 0.06 (-0.03; 0.15)        | 0.03 (-0.05; 0.10)           | -0.06 (-0.15; 0.04)          | -0.05 (-0.12; 0.03)     | 0.04 (-0.05; 0.14)       | 0.05 (-0.02; 0.13)           | -0.07 (-0.16; 0.02)          |
| Threonine                | 0.01 (-0.07; 0.08)       | 0.14 (0.04; 0.23)‡        | -0.05 (-0.13; 0.02)          | -0.11 (-0.20; -0.01)         | -0.01 (-0.09; 0.07)     | 0.02 (-0.08; 0.11)       | -0.06 (-0.13; 0.02)          | -0.12 (-0.21; -0.03)         |
| Tryptophan               | 0.07 (-0.01; 0.15)       | <b>0.16 (0.07; 0.25)*</b> | 0.01 (-0.07; 0.08)           | 0.03 (-0.07; 0.12)           | 0.05 (-0.03; 0.12)      | 0.01 (-0.08; 0.10)       | 0.01 (-0.07; 0.08)           | 0.02 (-0.08; 0.11)           |
| Valine                   | 0.03 (-0.05; 0.10)       | 0.06 (-0.04; 0.15)        | 0.03 (-0.04; 0.10)           | 0.05 (-0.02; 0.12)           | 0.00 (-0.08; 0.07)      | -0.07 (-0.16; 0.03)      | 0.08 (-0.01; 0.17)           | 0.09 (-0.02; 0.19)           |
| NEAAs/Conditionally EAAs |                          |                           |                              |                              |                         |                          |                              |                              |
| Alanine                  | -0.03 (-0.11; 0.04)      | 0.04 (-0.06; 0.13)        | 0.04 (-0.04; 0.12)           | 0.07 (-0.02; 0.16)           | -0.06 (-0.13; 0.02)     | -0.05 (-0.14; 0.04)      | 0.07 (-0.01; 0.14)           | 0.08 (-0.02; 0.17)           |
| Arginine                 | -0.08 (-0.16; -0.01)     | 0.04 (-0.06; 0.13)        | 0.02 (-0.06; 0.09)           | 0.13 (0.03; 0.22)‡           | -0.09 (-0.16; -0.01)    | -0.10 (-0.19; 0.00)      | 0.07 (-0.01; 0.14)           | 0.16 (0.06; 0.24)‡           |
| Asparagine               | 0.00 (-0.08; 0.07)       | 0.04 (-0.06; 0.13)        | <b>-0.12 (-0.20; -0.05)*</b> | <b>-0.28 (-0.36; -0.19)*</b> | 0.01 (-0.07; 0.08)      | 0.03 (-0.06; 0.13)       | <b>-0.14 (-0.22; -0.07)*</b> | <b>-0.33 (-0.41; -0.24)*</b> |
| Aspartate                | 0.00 (-0.08; 0.07)       | -0.01 (-0.08; 0.07)       | -0.05 (-0.12; 0.02)          | -0.06 (-0.14; 0.02)          | 0.05 (-0.01; 0.11)      | 0.06 (0.00; 0.12)        | -0.08 (-0.17; 0.02)          | -0.10 (-0.20; 0.01)          |
| Glutamate                | 0.01 (-0.07; 0.08)       | 0.00 (-0.09; 0.10)        | -0.04 (-0.10; 0.02)          | -0.05 (-0.12; 0.02)          | 0.01 (-0.04; 0.06)      | 0.04 (-0.03; 0.11)       | -0.05 (-0.12; 0.03)          | -0.08 (-0.18; 0.02)          |
| Glutamine                | 0.05 (-0.03; 0.13)       | 0.06 (-0.04; 0.15)        | <b>-0.12 (-0.19; -0.04)*</b> | <b>-0.18 (-0.27; -0.09)*</b> | 0.04 (-0.03; 0.12)      | 0.09 (-0.01; 0.18)       | <b>-0.15 (-0.22; -0.08)*</b> | <b>-0.24 (-0.32; -0.15)*</b> |
| Glycine                  | -0.06 (-0.14; 0.01)      | 0.06 (-0.04; 0.15)        | -0.11 (-0.19; -0.04)‡        | -0.02 (-0.11; 0.08)          | -0.01 (-0.09; 0.06)     | 0.03 (-0.06; 0.12)       | <b>-0.13 (-0.20; -0.05)*</b> | -0.05 (-0.14; 0.05)          |
| Serine                   | -0.03 (-0.11; 0.04)      | 0.07 (-0.03; 0.16)        | -0.11 (-0.19; -0.04)‡        | -0.12 (-0.21; -0.03)‡        | -0.01 (-0.09; 0.06)     | -0.03 (-0.12; 0.07)      | <b>-0.13 (-0.20; -0.06)*</b> | -0.13 (-0.22; -0.04)‡        |
| Tyrosine                 | -0.02 (-0.09; 0.06)      | 0.07 (-0.02; 0.17)        | 0.03 (-0.05; 0.11)           | 0.12 (0.03; 0.21)            | -0.03 (-0.10; 0.05)     | -0.01 (-0.1; 0.08)       | 0.04 (-0.03; 0.12)           | 0.14 (0.05; 0.23)‡           |
| Non-coded AAs            |                          |                           |                              |                              |                         |                          |                              |                              |
| Citrulline               | 0.03 (-0.04; 0.11)       | 0.13 (0.03; 0.22)‡        | -0.02 (-0.09; 0.06)          | -0.07 (-0.16; 0.02)          | 0.03 (-0.05; 0.10)      | 0.04 (-0.06; 0.13)       | -0.03 (-0.11; 0.04)          | -0.11 (-0.20; -0.01)         |
| Ornithine                | 0.02 (-0.06; 0.09)       | 0.01 (-0.08; 0.11)        | -0.02 (-0.09; 0.06)          | -0.01 (-0.11; 0.08)          | 0.04 (-0.03; 0.12)      | -0.05 (-0.14; 0.04)      | -0.04 (-0.12; 0.03)          | 0.01 (-0.09; 0.10)           |
| Taurine                  | 0.05 (-0.02; 0.13)       | 0.11 (0.02; 0.20)         | 0.06 (-0.01; 0.14)           | 0.05 (-0.05; 0.14)           | 0.06 (-0.02; 0.14)      | 0.03 (-0.07; 0.12)       | 0.05 (-0.02; 0.13)           | 0.04 (-0.06; 0.13)           |
| Sum                      |                          |                           |                              |                              |                         |                          |                              |                              |
| All FAAs                 | 0.01 (-0.06; 0.09)       | 0.05 (-0.05; 0.14)        | -0.05 (-0.12; 0.03)          | -0.07 (-0.17; 0.03)          | -0.02 (-0.08; 0.05)     | 0.03 (-0.05; 0.10)       | -0.06 (-0.14; 0.03)          | -0.09 (-0.19; 0.02)          |

FAA: free amino acid; EAA: essential amino acid; NEAA: non-essential amino acid; BMI: body mass index. ‡  $p < 0.01$ , \*  $p$ -value remains statistically significant following Bonferroni adjustment. Bonferroni-adjusted level of statistical significance is  $\alpha = 0.05/22 = 0.002$ .  $P$ -values  $< 0.002$  are indicated in bold.

**Table S3B.** Spearman correlation coefficients between total amino acids in human milk and maternal anthropometrics.

| TAA                      | Maternal anthropometrics |                          |                         |                           |                         |                          |                         |                           |
|--------------------------|--------------------------|--------------------------|-------------------------|---------------------------|-------------------------|--------------------------|-------------------------|---------------------------|
|                          | Age                      |                          | Weight                  |                           | Height                  |                          | BMI                     |                           |
|                          | 6 weeks<br>Rho (95% CI)  | 6 months<br>Rho (95% CI) | 6 weeks<br>Rho (95% CI) | 6 months<br>Rho (95% CI)  | 6 weeks<br>Rho (95% CI) | 6 months<br>Rho (95% CI) | 6 weeks<br>Rho (95% CI) | 6 months<br>Rho (95% CI)  |
| EAAs                     |                          |                          |                         |                           |                         |                          |                         |                           |
| <b>Histidine</b>         | 0.02 (-0.06; 0.09)       | 0.11 (0.02; 0.20)        | 0.02 (-0.05; 0.10)      | 0.13 (0.04; 0.22)†        | 0.04 (-0.04; 0.11)      | -0.06 (-0.15; 0.04)      | 0.00 (-0.08; 0.07)      | 0.13 (0.04; 0.22)†        |
| <b>Isoleucine</b>        | 0.08 (0.01; 0.16)        | 0.12 (0.02; 0.21)        | 0.02 (-0.05; 0.10)      | 0.12 (0.03; 0.21)         | 0.06 (-0.02; 0.14)      | -0.02 (-0.11; 0.07)      | 0.00 (-0.08; 0.07)      | 0.10 (0.00; 0.19)         |
| <b>Leucine</b>           | 0.05 (-0.02; 0.13)       | 0.12 (0.02; 0.21)        | 0.02 (-0.06; 0.10)      | <b>0.15 (0.06; 0.24)*</b> | 0.04 (-0.03; 0.12)      | -0.03 (-0.13; 0.06)      | 0.00 (-0.08; 0.08)      | <b>0.14 (0.05; 0.23)*</b> |
| <b>Lysine</b>            | 0.04 (-0.04; 0.12)       | 0.12 (0.02; 0.21)        | -0.02 (-0.09; 0.06)     | 0.11 (0.02; 0.21)         | 0.02 (-0.05; 0.10)      | -0.04 (-0.14; 0.05)      | -0.03 (-0.11; 0.04)     | 0.11 (0.02; 0.20)         |
| <b>Methionine</b>        | 0.03 (-0.05; 0.11)       | 0.14 (0.04; 0.23)†       | 0.09 (0.01; 0.17)       | 0.09 (0.00; 0.18)         | 0.06 (-0.02; 0.13)      | 0.00 (-0.09; 0.09)       | 0.06 (-0.01; 0.14)      | 0.07 (-0.02; 0.16)        |
| <b>Phenylalanine</b>     | 0.00 (-0.07; 0.08)       | 0.10 (0.01; 0.19)        | 0.04 (-0.03; 0.12)      | <b>0.17 (0.08; 0.26)*</b> | 0.03 (-0.05; 0.10)      | -0.04 (-0.13; 0.06)      | 0.03 (-0.05; 0.10)      | <b>0.17 (0.07; 0.26)*</b> |
| <b>Threonine</b>         | 0.02 (-0.06; 0.10)       | 0.10 (0.01; 0.19)        | 0.07 (-0.01; 0.14)      | <b>0.16 (0.07; 0.25)*</b> | 0.00 (-0.07; 0.08)      | -0.05 (-0.15; 0.04)      | 0.07 (-0.01; 0.15)      | <b>0.16 (0.07; 0.25)*</b> |
| <b>Valine</b>            | 0.03 (-0.05; 0.10)       | 0.10 (0.01; 0.19)        | 0.09 (0.01; 0.16)       | <b>0.19 (0.10; 0.28)*</b> | 0.02 (-0.06; 0.09)      | -0.02 (-0.11; 0.08)      | 0.08 (0.00; 0.15)†      | <b>0.18 (0.09; 0.27)*</b> |
| NEAAs/conditionally EAAs |                          |                          |                         |                           |                         |                          |                         |                           |
| <b>Alanine</b>           | 0.00 (-0.07; 0.08)       | 0.06 (-0.03; 0.16)       | -0.01 (-0.09; 0.06)     | <b>0.18 (0.08; 0.27)*</b> | -0.04 (-0.11; 0.04)     | -0.05 (-0.15; 0.04)      | -0.01 (-0.08; 0.07)     | <b>0.18 (0.09; 0.27)*</b> |
| <b>Arginine</b>          | 0.00 (-0.08; 0.08)       | 0.00 (-0.09; 0.10)       | 0.04 (-0.04; 0.12)      | 0.07 (-0.03; 0.16)        | -0.02 (-0.09; 0.06)     | -0.07 (-0.17; 0.02)      | 0.05 (-0.03; 0.12)      | 0.10 (0.00; 0.19)         |
| <b>Asx</b>               | 0.02 (-0.06; 0.09)       | 0.09 (0.00; 0.19)        | 0.01 (-0.07; 0.08)      | <b>0.16 (0.07; 0.25)*</b> | 0.01 (-0.06; 0.09)      | -0.06 (-0.15; 0.03)      | 0.00 (-0.08; 0.07)      | <b>0.16 (0.07; 0.25)*</b> |
| <b>Glx</b>               | 0.06 (-0.01; 0.14)       | 0.12 (0.03; 0.21)        | 0.01 (-0.06; 0.09)      | 0.10 (0.00; 0.19)         | 0.05 (-0.03; 0.12)      | -0.04 (-0.13; 0.06)      | -0.01 (-0.09; 0.06)     | 0.08 (-0.01; 0.17)        |
| <b>Glycine</b>           | -0.01 (-0.08; 0.07)      | 0.08 (-0.02; 0.17)       | 0.02 (-0.06; 0.09)      | <b>0.16 (0.07; 0.25)*</b> | -0.01 (-0.09; 0.07)     | -0.04 (-0.14; 0.05)      | 0.02 (-0.05; 0.10)      | <b>0.16 (0.07; 0.25)*</b> |
| <b>Serine</b>            | 0.01 (-0.07; 0.09)       | 0.09 (0.00; 0.18)        | 0.03 (-0.04; 0.11)      | <b>0.17 (0.08; 0.26)*</b> | 0.01 (-0.07; 0.08)      | -0.06 (-0.16; 0.03)      | 0.03 (-0.04; 0.11)      | <b>0.18 (0.09; 0.27)*</b> |

|                 |                    |                   |                    |                           |                    |                     |                    |                           |
|-----------------|--------------------|-------------------|--------------------|---------------------------|--------------------|---------------------|--------------------|---------------------------|
| <b>Tyrosine</b> | 0.03 (-0.04; 0.11) | 0.10 (0.00; 0.19) | 0.04 (-0.04; 0.11) | <b>0.19 (0.10; 0.28)*</b> | 0.04 (-0.04; 0.11) | -0.02 (-0.11; 0.08) | 0.02 (-0.06; 0.09) | <b>0.17 (0.08; 0.26)*</b> |
| <b>Sum</b>      |                    |                   |                    |                           |                    |                     |                    |                           |
| <b>All TAAs</b> | 0.03 (-0.04; 0.11) | 0.11 (0.02; 0.20) | 0.03 (-0.05; 0.11) | <b>0.15 (0.05; 0.24)*</b> | 0.03 (-0.05; 0.10) | -0.05 (-0.15; 0.04) | 0.01 (-0.06; 0.09) | <b>0.14 (0.05; 0.23)*</b> |

TAA: total amino acid; EAA: essential amino acid; NEAA: non-essential amino acid; Glx: glutamate + glutamine; Asx: aspartate + asparagine; BMI: body mass index. ‡  $p < 0.01$ , \*  $p$ -value remains statistically significant following Bonferroni adjustment. Bonferroni-adjusted level of statistical significance is  $\alpha = 0.05/16 = 0.003$ .  $P$ -values  $< 0.003$  are indicated in bold.

**Table S3C.** Spearman correlation coefficients between free amino acids in human milk and infant anthropometrics.

| FAA                      | Infant anthropometrics  |                          |                         |                          |                         |                          |                           |                          |
|--------------------------|-------------------------|--------------------------|-------------------------|--------------------------|-------------------------|--------------------------|---------------------------|--------------------------|
|                          | Birth length            |                          | Birth weight            |                          | Gain in length          |                          | Gain in weight            |                          |
|                          | 6 weeks<br>Rho (95% CI) | 6 months<br>Rho (95% CI) | 6 weeks<br>Rho (95% CI) | 6 months<br>Rho (95% CI) | 6 weeks<br>Rho (95% CI) | 6 months<br>Rho (95% CI) | 6 weeks<br>Rho (95% CI)   | 6 months<br>Rho (95% CI) |
| EAA                      |                         |                          |                         |                          |                         |                          |                           |                          |
| <b>Histidine</b>         | 0.00 (-0.08; 0.08)      | -0.10 (-0.20; -0.01)     | 0.04 (-0.04; 0.12)      | -0.02 (-0.12; 0.08)      | 0.01 (-0.07; 0.09)      | 0.02 (-0.08; 0.11)       | 0.08 (0.00; 0.16)         | 0.03 (-0.07; 0.12)       |
| <b>Isoleucine</b>        | -0.04 (-0.12; 0.04)     | -0.02 (-0.11; 0.08)      | -0.08 (-0.16; 0.00)     | 0.03 (-0.06; 0.13)       | -0.04 (-0.12; 0.04)     | 0.01 (-0.09; 0.10)       | -0.01 (-0.09; 0.07)       | -0.01 (-0.1; 0.09)       |
| <b>Leucine</b>           | 0.01 (-0.07; 0.08)      | -0.04 (-0.13; 0.06)      | -0.01 (-0.09; 0.07)     | 0.03 (-0.07; 0.12)       | 0.00 (-0.08; 0.08)      | 0.02 (-0.08; 0.12)       | 0.03 (-0.05; 0.11)        | -0.01 (-0.11; 0.08)      |
| <b>Lysine</b>            | -0.03 (-0.11; 0.05)     | -0.06 (-0.16; 0.03)      | -0.01 (-0.09; 0.07)     | -0.02 (-0.11; 0.08)      | -0.07 (-0.15; 0.01)     | 0.04 (-0.06; 0.13)       | -0.03 (-0.11; 0.05)       | -0.01 (-0.11; 0.08)      |
| <b>Methionine</b>        | -0.02 (-0.10; 0.06)     | -0.05 (-0.14; 0.05)      | -0.07 (-0.14; 0.01)     | -0.03 (-0.12; 0.07)      | 0.01 (-0.07; 0.09)      | -0.03 (-0.12; 0.07)      | -0.03 (-0.11; 0.05)       | 0.03 (-0.07; 0.12)       |
| <b>Phenylalanine</b>     | 0.02 (-0.06; 0.10)      | -0.05 (-0.15; 0.05)      | 0.01 (-0.07; 0.09)      | 0.02 (-0.08; 0.11)       | -0.05 (-0.13; 0.03)     | 0.08 (-0.02; 0.17)       | -0.04 (-0.12; 0.04)       | 0.08 (-0.01; 0.17)       |
| <b>Threonine</b>         | -0.03 (-0.11; 0.05)     | -0.08 (-0.18; 0.01)      | 0.02 (-0.06; 0.10)      | -0.02 (-0.11; 0.08)      | 0.04 (-0.04; 0.12)      | 0.00 (-0.10; 0.09)       | 0.11 (0.03; 0.19)†        | -0.02 (-0.12; 0.07)      |
| <b>Tryptophan</b>        | 0.04 (-0.04; 0.12)      | 0.11 (0.01; 0.20)        | -0.03 (-0.11; 0.05)     | 0.05 (-0.05; 0.14)       | -0.05 (-0.13; 0.03)     | 0.04 (-0.06; 0.13)       | 0.03 (-0.05; 0.11)        | 0.01 (-0.08; 0.11)       |
| <b>Valine</b>            | 0.00 (-0.08; 0.08)      | -0.07 (-0.17; 0.02)      | 0.03 (-0.05; 0.11)      | -0.04 (-0.14; 0.05)      | -0.07 (-0.15; 0.01)     | -0.02 (-0.11; 0.08)      | -0.05 (-0.13; 0.03)       | 0.00 (-0.10; 0.09)       |
| NEAAs/conditionally EAAs |                         |                          |                         |                          |                         |                          |                           |                          |
| <b>Alanine</b>           | 0.00 (-0.08; 0.08)      | -0.01 (-0.11; 0.08)      | 0.02 (-0.06; 0.09)      | -0.03 (-0.12; 0.07)      | 0.02 (-0.06; 0.10)      | 0.00 (-0.10; 0.10)       | 0.03 (-0.05; 0.11)        | -0.05 (-0.15; 0.04)      |
| <b>Arginine</b>          | -0.08 (-0.16; 0.00)     | 0.01 (-0.08; 0.11)       | -0.07 (-0.14; 0.02)     | -0.06 (-0.16; 0.03)      | -0.02 (-0.10; 0.06)     | -0.01 (-0.10; 0.09)      | -0.02 (-0.10; 0.06)       | -0.01 (-0.10; 0.09)      |
| <b>Asparagine</b>        | -0.01 (-0.09; 0.07)     | -0.08 (-0.17; 0.02)      | -0.06 (-0.14; 0.02)     | -0.06 (-0.16; 0.03)      | -0.02 (-0.10; 0.06)     | 0.03 (-0.06; 0.13)       | 0.06 (-0.02; 0.14)        | 0.01 (-0.09; 0.10)       |
| <b>Aspartate</b>         | 0.05 (-0.03; 0.13)      | 0.01 (-0.08; 0.11)       | -0.01 (-0.09; 0.07)     | 0.03 (-0.07; 0.12)       | -0.09 (-0.17; -0.01)    | -0.01 (-0.1; 0.09)       | -0.02 (-0.10; 0.06)       | -0.07 (-0.16; 0.03)      |
| <b>Glutamate</b>         | 0.01 (-0.07; 0.09)      | -0.02 (-0.12; 0.07)      | 0.02 (-0.06; 0.10)      | 0.01 (-0.09; 0.10)       | 0.00 (-0.08; 0.08)      | -0.02 (-0.11; 0.08)      | <b>0.12 (0.04; 0.20)*</b> | -0.04 (-0.13; 0.06)      |



|                      |                     |                     |                     |                     |                      |                    |                           |                     |
|----------------------|---------------------|---------------------|---------------------|---------------------|----------------------|--------------------|---------------------------|---------------------|
| <b>Glutamine</b>     | 0.01 (-0.07; 0.09)  | -0.03 (-0.12; 0.07) | 0.00 (-0.08; 0.08)  | 0.00 (-0.10; 0.09)  | 0.10 (0.05; 0.15)‡   | 0.04 (-0.06; 0.13) | <b>0.22 (0.14; 0.29)*</b> | 0.06 (-0.03; 0.16)  |
| <b>Glycine</b>       | -0.01 (-0.09; 0.07) | -0.04 (-0.13; 0.06) | -0.01 (-0.09; 0.07) | 0.01 (-0.08; 0.11)  | 0.01 (-0.07; 0.09)   | 0.06 (-0.03; 0.16) | 0.05 (-0.03; 0.13)        | 0.03 (-0.06; 0.13)  |
| <b>Serine</b>        | 0.02 (-0.07; 0.09)  | -0.08 (-0.17; 0.02) | 0.00 (-0.08; 0.08)  | -0.03 (-0.13; 0.06) | 0.06 (-0.03; 0.13)   | 0.08 (-0.02; 0.17) | <b>0.19 (0.11; 0.27)*</b> | 0.08 (-0.02; 0.17)  |
| <b>Tyrosine</b>      | 0.02 (-0.06; 0.10)  | -0.01 (-0.11; 0.08) | -0.01 (-0.08; 0.08) | 0.08 (-0.02; 0.17)  | -0.07 (-0.15; 0.01)  | 0.05 (-0.05; 0.15) | 0.04 (-0.04; 0.12)        | 0.09 (-0.01; 0.18)  |
| <b>Non-coded AAs</b> |                     |                     |                     |                     |                      |                    |                           |                     |
| <b>Citrulline</b>    | 0.04 (-0.04; 0.12)  | -0.05 (-0.15; 0.05) | 0.02 (-0.06; 0.10)  | -0.03 (-0.12; 0.07) | 0.01 (-0.07; 0.09)   | 0.04 (-0.06; 0.13) | 0.09 (0.01; 0.17)         | 0.02 (-0.08; 0.11)  |
| <b>Ornithine</b>     | 0.00 (-0.08; 0.08)  | -0.02 (-0.12; 0.07) | -0.03 (-0.11; 0.05) | -0.03 (-0.13; 0.06) | -0.09 (-0.17; -0.01) | 0.01 (-0.09; 0.10) | -0.03 (-0.11; 0.05)       | 0.05 (-0.05; 0.14)  |
| <b>Taurine</b>       | 0.07 (-0.01; 0.15)  | 0.09 (-0.01; 0.18)  | 0.04 (-0.04; 0.12)  | 0.08 (-0.02; 0.17)  | 0.06 (-0.02; 0.14)   | 0.04 (-0.05; 0.14) | 0.05 (-0.03; 0.13)        | -0.03 (-0.12; 0.07) |
| <b>Sum</b>           |                     |                     |                     |                     |                      |                    |                           |                     |
| <b>All FAAs</b>      | 0.02 (-0.06; 0.10)  | -0.03 (-0.12; 0.07) | 0.02 (-0.06; 0.10)  | 0.01 (-0.09; 0.10)  | 0.00 (-0.08; 0.08)   | 0.04 (-0.06; 0.13) | <b>0.16 (0.08; 0.24)*</b> | 0.00 (-0.09; 0.10)  |

FAA: free amino acid; EAA: essential amino acid; NEAA: non-essential amino acid. ‡  $p < 0.01$ , \*  $p$ -value remains statistically significant following Bonferroni adjustment. Bonferroni-adjusted level of statistical significance is  $\alpha = 0.05/22 = 0.002$ .  $P$ -values  $< 0.002$  are indicated in bold.

**Table S3D.** Spearman correlation coefficients between total amino acids in human milk and infant anthropometrics.

| TAA                      | Infant anthropometrics  |                          |                         |                          |                              |                          |                              |                          |
|--------------------------|-------------------------|--------------------------|-------------------------|--------------------------|------------------------------|--------------------------|------------------------------|--------------------------|
|                          | Birth length            |                          | Birth weight            |                          | Gain in length               |                          | Gain in weight               |                          |
|                          | 6 weeks<br>Rho (95% CI) | 6 months<br>Rho (95% CI) | 6 weeks<br>Rho (95% CI) | 6 months<br>Rho (95% CI) | 6 weeks<br>Rho (95% CI)      | 6 months<br>Rho (95% CI) | 6 weeks<br>Rho (95% CI)      | 6 months<br>Rho (95% CI) |
| EAAs                     |                         |                          |                         |                          |                              |                          |                              |                          |
| <b>Histidine</b>         | 0.02 (-0.06; 0.10)      | 0.10 (0.01; 0.20)        | -0.03 (-0.11; 0.05)     | 0.06 (-0.03; 0.16)       | -0.11 (-0.19; -0.04)†        | -0.12 (-0.22; -0.03)     | <b>-0.16 (-0.23; -0.08)*</b> | -0.06 (-0.15; 0.04)      |
| <b>Isoleucine</b>        | -0.01 (-0.09; 0.07)     | 0.08 (-0.02; 0.17)       | 0.00 (-0.08; 0.08)      | 0.06 (-0.04; 0.15)       | -0.06 (-0.13; 0.03)          | -0.12 (-0.21; -0.03)     | <b>-0.12 (-0.20; -0.04)*</b> | -0.08 (-0.17; 0.02)      |
| <b>Leucine</b>           | 0.03 (-0.05; 0.11)      | 0.10 (0.00; 0.19)        | -0.01 (-0.09; 0.07)     | 0.07 (-0.02; 0.17)       | -0.11 (-0.19; -0.03)†        | -0.13 (-0.22; -0.03)†    | <b>-0.12 (-0.20; -0.04)*</b> | -0.07 (-0.16; 0.03)      |
| <b>Lysine</b>            | 0.04 (-0.04; 0.12)      | 0.10 (0.01; 0.19)        | -0.01 (-0.09; 0.07)     | 0.07 (-0.02; 0.17)       | -0.12 (-0.2; -0.04)†         | -0.12 (-0.22; -0.03)     | <b>-0.13 (-0.20; -0.05)*</b> | -0.07 (-0.16; 0.03)      |
| <b>Methionine</b>        | -0.01 (-0.08; 0.07)     | 0.03 (-0.06; 0.13)       | -0.03 (-0.11; 0.05)     | 0.03 (-0.07; 0.12)       | -0.03 (-0.11; 0.05)          | -0.08 (-0.18; 0.01)      | -0.09 (-0.17; -0.01)         | -0.05 (-0.14; 0.05)      |
| <b>Phenylalanine</b>     | 0.02 (-0.06; 0.10)      | 0.09 (0.00; 0.18)        | -0.03 (-0.11; 0.05)     | 0.07 (-0.02; 0.17)       | -0.12 (-0.20; -0.04)†        | -0.11 (-0.20; -0.01)     | <b>-0.16 (-0.23; -0.08)*</b> | -0.05 (-0.15; 0.04)      |
| <b>Threonine</b>         | 0.00 (-0.08; 0.08)      | 0.09 (-0.01; 0.18)       | -0.01 (-0.09; 0.07)     | 0.06 (-0.03; 0.16)       | -0.10 (-0.18; -0.02)         | -0.11 (-0.20; -0.01)     | <b>-0.16 (-0.23; -0.08)*</b> | -0.06 (-0.16; 0.04)      |
| <b>Valine</b>            | 0.00 (-0.08; 0.08)      | 0.04 (-0.06; 0.13)       | -0.01 (-0.08; 0.08)     | 0.05 (-0.05; 0.14)       | -0.10 (-0.18; -0.02)         | -0.09 (-0.18; 0.00)      | <b>-0.16 (-0.24; -0.08)*</b> | -0.04 (-0.14; 0.05)      |
| NEAAs/conditionally EAAs |                         |                          |                         |                          |                              |                          |                              |                          |
| <b>Alanine</b>           | 0.05 (-0.03; 0.13)      | 0.09 (0.00; 0.19)        | 0.00 (-0.08; 0.08)      | 0.06 (-0.04; 0.15)       | <b>-0.13 (-0.21; -0.05)*</b> | -0.09 (-0.18; 0.01)      | <b>-0.13 (-0.21; -0.06)*</b> | -0.06 (-0.15; 0.04)      |
| <b>Arginine</b>          | 0.03 (-0.05; 0.11)      | 0.11 (0.01; 0.20)        | 0.01 (-0.07; 0.09)      | 0.04 (-0.05; 0.14)       | <b>-0.13 (-0.21; -0.06)*</b> | -0.09 (-0.18; 0.01)      | -0.12 (-0.20; -0.04)†        | -0.08 (-0.17; 0.02)      |
| <b>Asx</b>               | 0.03 (-0.05; 0.11)      | 0.11 (0.01; 0.20)        | -0.02 (-0.10; 0.06)     | 0.07 (-0.03; 0.16)       | <b>-0.13 (-0.21; -0.05)*</b> | -0.12 (-0.21; -0.02)     | <b>-0.15 (-0.23; -0.07)*</b> | -0.08 (-0.17; 0.02)      |
| <b>Glx</b>               | 0.02 (-0.06; 0.10)      | 0.08 (-0.02; 0.17)       | -0.01 (-0.09; 0.07)     | 0.06 (-0.04; 0.15)       | -0.09 (-0.17; -0.01)         | -0.13 (-0.22; -0.03)†    | -0.08 (-0.16; 0.00)          | -0.09 (-0.18; 0.01)      |
| <b>Glycine</b>           | 0.03 (-0.05; 0.11)      | 0.10 (0.00; 0.19)        | -0.02 (-0.10; 0.06)     | 0.07 (-0.03; 0.16)       | <b>-0.14 (-0.21; -0.06)*</b> | -0.08 (-0.18; 0.01)      | <b>-0.14 (-0.22; -0.06)*</b> | -0.05 (-0.14; 0.05)      |
| <b>Serine</b>            | 0.01 (-0.07; 0.09)      | 0.10 (0.00; 0.19)        | -0.02 (-0.10; 0.06)     | 0.07 (-0.03; 0.16)       | -0.12 (-0.20; -0.04)†        | -0.09 (-0.19; 0.00)      | <b>-0.15 (-0.22; -0.07)*</b> | -0.04 (-0.14; 0.05)      |

|                        |                    |                   |                     |                    |                              |                       |                              |                     |
|------------------------|--------------------|-------------------|---------------------|--------------------|------------------------------|-----------------------|------------------------------|---------------------|
| <b>Tyrosine</b>        | 0.02 (-0.06; 0.10) | 0.13 (0.03; 0.22) | -0.01 (-0.09; 0.07) | 0.10 (0.00; 0.19)  | -0.10 (-0.18; -0.02)         | -0.13 (-0.22; -0.03)‡ | <b>-0.14 (-0.22; -0.06)*</b> | -0.06 (-0.15; 0.04) |
| <b>Sum</b>             |                    |                   |                     |                    |                              |                       |                              |                     |
| <b>Sum of all TAAs</b> | 0.03 (-0.06; 0.10) | 0.10 (0.01; 0.19) | -0.02 (-0.10; 0.06) | 0.07 (-0.03; 0.16) | <b>-0.13 (-0.21; -0.05)*</b> | -0.12 (-0.22; -0.03)  | <b>-0.15 (-0.23; -0.07)*</b> | -0.08 (-0.17; 0.02) |

TAA: total amino acid; EAA: essential amino acid; NEAA: non-essential amino acid; Glx: glutamate + glutamine; Asx: aspartate + asparagine. ‡  $p < 0.01$ , \*  $p$ -value remains statistically significant following Bonferroni adjustment. Bonferroni-adjusted level of statistical significance is  $\alpha = 0.05/16 = 0.003$ .  $P$ -values  $< 0.003$  are indicated in bold.

**Table S4.** Partial correlation coefficients between amino acids in human milk and infant and maternal factors.

| Anthropometric measurement      | Sample collection time | Amino acid      | Beta estimate (95% CI)   | <i>p</i> -value    | Putative confounders included                                                        |
|---------------------------------|------------------------|-----------------|--------------------------|--------------------|--------------------------------------------------------------------------------------|
| <b>Maternal characteristics</b> |                        |                 |                          |                    |                                                                                      |
| <b>Pre-pregnancy weight</b>     | 6 weeks                | Free glutamine  | -0.676 (-1.556; 0.205)   | 0.132              | Infant gender, maternal age, history in allergic disease                             |
|                                 |                        | Free asparagine | -0.089 (-0.171; -0.008)  | 0.031 <sup>†</sup> |                                                                                      |
|                                 | 6 months               | Free glutamine  | -2.686 (6.783; -1.410)   | 0.198              |                                                                                      |
|                                 |                        | Free asparagine | -0.029 (-0.160; 0.102)   | 0.667              |                                                                                      |
|                                 |                        | Sum of all TAAs | 8.340 (-7.430; 24.111)   | 0.299              |                                                                                      |
| <b>Pre-pregnancy BMI</b>        | 6 weeks                | Free glutamine  | -1.301 (-3.752; 1.150)   | 0.298              | Infant gender, maternal age, history in allergic disease                             |
|                                 |                        | Free asparagine | -0.167 (-0.396; 0.063)   | 0.155              |                                                                                      |
|                                 |                        | Free serine     | -0.403 (-0.935; 0.128)   | 0.136              |                                                                                      |
|                                 |                        | Free glycine    | -0.513 (-1.135; 0.103)   | 0.102              |                                                                                      |
|                                 | 6 months               | Free glutamine  | -0.916 (-6.101; 4.270)   | 0.729              |                                                                                      |
|                                 |                        | Free asparagine | -0.099 (-0.268; 0.069)   | 0.245              |                                                                                      |
|                                 |                        | Sum of all TAAs | 9.938 (-10.177; 30.053)  | 0.332              |                                                                                      |
| <b>Age</b>                      | 6 months               | Free tryptophan | 0.298 (0.022; 0.574)     | 0.034 <sup>†</sup> | Infant gender, maternal pre-pregnancy BMI, history in allergic disease               |
| <b>Infant characteristics</b>   |                        |                 |                          |                    |                                                                                      |
| <b>Gain in weight</b>           | 6 weeks                | Free glutamate  | 0.032 (-0.016; 0.080)    | 0.190              | Infant gender, maternal age, maternal pre-pregnancy BMI, history in allergic disease |
|                                 |                        | Free glutamine  | 0.015 (0.008; 0.023)     | 0.005 <sup>‡</sup> |                                                                                      |
|                                 |                        | Free serine     | 0.004 (0.001; 0.008)     | 0.046 <sup>†</sup> |                                                                                      |
|                                 |                        | Sum of all TAAs | -0.212 (-0.364; -0.060)  | <b>0.003*</b>      |                                                                                      |
|                                 | 6 months               | Sum of all TAAs | -0.155 (-0.267; -0.043)  | 0.007 <sup>†</sup> |                                                                                      |
| <b>Gain in length</b>           | 6 weeks                | Free glutamine  | 5.436 (-0.811; 11.683)   | 0.088              |                                                                                      |
|                                 |                        | Sum of all TAAs | -8.568 (-13.554; -3.582) | <b>&lt;0.001*</b>  |                                                                                      |

TAAs: total amino acids; BMI: body mass index. <sup>†</sup>  $p < 0.05$ , <sup>‡</sup>  $p < 0.01$ , \*  $p$ -value remains statistically significant following Bonferroni adjustment. Bonferroni-adjusted level of statistical significance for FAAs is  $\alpha = 0.05/16 = 0.002$  and for TAAs is  $\alpha = 0.05/16 = 0.003$ .

**Table S5A.** Free amino acid levels in human milk of mothers with or without an allergy.

| FAA (μmol/L)             | 6 weeks<br>Mean (SD)                          |                                         | 6 months<br>Mean (SD)                         |                                         | Analysis of<br>differences<br>at 6 weeks<br>( <i>p</i> -value) | Analysis of<br>differences<br>at 6 months<br>( <i>p</i> -value) |
|--------------------------|-----------------------------------------------|-----------------------------------------|-----------------------------------------------|-----------------------------------------|----------------------------------------------------------------|-----------------------------------------------------------------|
|                          | Mothers<br>without an<br>allergy<br>(n = 443) | Mothers with<br>an allergy<br>(n = 225) | Mothers<br>without an<br>allergy<br>(n = 274) | Mothers with<br>an allergy<br>(n = 166) |                                                                |                                                                 |
| EAAs                     |                                               |                                         |                                               |                                         |                                                                |                                                                 |
| Histidine                | 28.1 (9.3)                                    | 28.6 (8.8)                              | 28.6 (12.1)                                   | 31.2 (16.0)                             | 0.456                                                          | 0.068                                                           |
| Isoleucine               | 16.8 (10.8)                                   | 15.8 (9.1)                              | 12.1 (5.1)                                    | 13.6 (6.8)                              | 0.179                                                          | 0.017                                                           |
| Leucine                  | 34.1 (16.7)                                   | 33.6 (19.9)                             | 34.0 (10.8)                                   | 36.3 (12.3)                             | 0.740                                                          | 0.045                                                           |
| Lysine                   | 36.0 (25.6)                                   | 32.5 (20.6)                             | 28.9 (12.9)                                   | 32.1 (17.6)                             | 0.058                                                          | 0.043                                                           |
| Methionine               | 27.9 (23.8)                                   | 27.9 (25.2)                             | 33.1 (26.7)                                   | 36.8 (27.8)                             | 0.997                                                          | 0.162                                                           |
| Phenylalanine            | 21.3 (9.9)                                    | 21.3 (10.6)                             | 16.2 (5.2)                                    | 16.8 (6.1)                              | 0.972                                                          | 0.325                                                           |
| Threonine                | 72.2 (30.7)                                   | 69.0 (26.4)                             | 97.6 (38.8)                                   | 96.0 (34.7)                             | 0.160                                                          | 0.644                                                           |
| Tryptophan               | 14.4 (7.3)                                    | 14.9 (7.8)                              | 29.3 (11.9)                                   | 28.7 (11.7)                             | 0.444                                                          | 0.613                                                           |
| Valine                   | 108.6 (59.6)                                  | 111.4 (55.7)                            | 65.2 (27.4)                                   | 69.0 (27.4)                             | 0.546                                                          | 0.157                                                           |
| NEAAs/Conditionally EAAs |                                               |                                         |                                               |                                         |                                                                |                                                                 |
| Alanine                  | 231.9 (65.1)                                  | 230.4 (62.4)                            | 238.4 (70.3)                                  | 250.0 (75.0)                            | 0.780                                                          | 0.108                                                           |
| Arginine                 | 16.9 (12.0)                                   | 17.2 (10.0)                             | 16.6 (5.8)                                    | 17.7 (7.3)                              | 0.755                                                          | 0.091                                                           |
| Asparagine               | 24.1 (14.4)                                   | 26.8 (15.8)                             | 18.1 (8.6)                                    | 16.9 (8.6)                              | 0.130                                                          | 0.146                                                           |
| Aspartate                | 31.1 (18.0)                                   | 30.6 (18.6)                             | 62.5 (36.5)                                   | 69.6 (42.7)                             | 0.709                                                          | 0.076                                                           |
| Glutamate                | 1325.2 (418.8)                                | 1273.5 (391.3)                          | 1531.4 (323.1)                                | 1526.6 (338.6)                          | 0.116                                                          | 0.882                                                           |
| Glutamine                | 238.4 (160.6)                                 | 241.3 (162.4)                           | 579.4 (268.0)                                 | 498.3 (263.4)                           | 0.828                                                          | <0.001*                                                         |
| Glycine                  | 140.0 (41.4)                                  | 137.3 (38.3)                            | 145.5 (46.5)                                  | 146.6 (49.9)                            | 0.403                                                          | 0.817                                                           |
| Serine                   | 101.6 (35.7)                                  | 97.8 (32.3)                             | 137.4 (58.5)                                  | 136.9 (63.5)                            | 0.165                                                          | 0.928                                                           |
| Tyrosine                 | 27.2 (19.8)                                   | 28.0 (21.0)                             | 16.7 (7.0)                                    | 18.7 (8.9)                              | 0.658                                                          | 0.014                                                           |
| Non-coded AAs            |                                               |                                         |                                               |                                         |                                                                |                                                                 |
| Citrulline               | 10.6 (4.7)                                    | 10.9 (4.8)                              | 20.9 (6.2)                                    | 20.5 (5.8)                              | 0.410                                                          | 0.424                                                           |
| Ornithine                | 14.4 (16.3)                                   | 15.6 (17.5)                             | 13.6 (23.1)                                   | 18.6 (31.1)                             | 0.370                                                          | 0.071                                                           |
| Taurine                  | 244.4 (94.3)                                  | 242.9 (91.3)                            | 264.6 (103.2)                                 | 269.2 (111.3)                           | 0.840                                                          | 0.668                                                           |
| Sum                      |                                               |                                         |                                               |                                         |                                                                |                                                                 |
| All FAAs                 | 2765.3 (668.7)                                | 2707.3 (593.2)                          | 3390.2 (681.8)                                | 3350.0 (666.6)                          | 0.253                                                          | 0.543                                                           |

FAA: free amino acid; EAA: essential amino acid; NEAA: non-essential amino acid. \* *p*-value remains statistically significant following Bonferroni adjustment. Bonferroni-adjusted level of statistical significance is  $\alpha = 0.05/22 = 0.002$ . *P*-values < 0.002 are indicated in bold.

**Table S5B.** Total amino acid levels in human milk of mothers with or without an allergy.

| TAA (μmol/L)             | 6 weeks<br>Mean (SD)                          |                                         | 6 months<br>Mean (SD)                         |                                         | Analysis of<br>differences<br>at 6 weeks<br>( <i>p</i> -value) | Analysis of<br>differences<br>at 6 months<br>( <i>p</i> -value) |
|--------------------------|-----------------------------------------------|-----------------------------------------|-----------------------------------------------|-----------------------------------------|----------------------------------------------------------------|-----------------------------------------------------------------|
|                          | Mothers<br>without an<br>allergy<br>(n = 443) | Mothers with<br>an allergy<br>(n = 225) | Mothers<br>without an<br>allergy<br>(n = 274) | Mothers with<br>an allergy<br>(n = 166) |                                                                |                                                                 |
| EAAs                     |                                               |                                         |                                               |                                         |                                                                |                                                                 |
| Histidine                | 1790.6 (262.2)                                | 1805.2 (270.1)                          | 1322.1 (197.3)                                | 1334.9 (207.3)                          | 0.646                                                          | 0.221                                                           |
| Isoleucine               | 4013.1 (575.6)                                | 4077.0 (646.8)                          | 3380.2 (457.9)                                | 3389.2 (464.2)                          | 0.078                                                          | 0.930                                                           |
| Leucine                  | 8684.2 (1227.8)                               | 8710.3 (1250.2)                         | 6772.1 (902.8)                                | 6833.8 (949.9)                          | 0.759                                                          | 0.127                                                           |
| Lysine                   | 6367.2 (940.1)                                | 6354.0 (969.2)                          | 3948.8 (607.3)                                | 3993.6 (653.1)                          | 0.386                                                          | 0.851                                                           |
| Methionine               | 1009.9 (207.3)                                | 1011.5 (189.1)                          | 749.7 (256.0)                                 | 752.5 (144.4)                           | 0.763                                                          | 0.292                                                           |
| Phenylalanine            | 2615.1 (439.4)                                | 2605.0 (389.8)                          | 2043.9 (282.3)                                | 2082.9 (337.5)                          | 0.506                                                          | 0.132                                                           |
| Threonine                | 3700.5 (581.6)                                | 3722.3 (576.0)                          | 3345.0 (465.8)                                | 3409.0 (567.5)                          | 0.763                                                          | 0.213                                                           |
| Valine                   | 4654.0 (760.9)                                | 4695.0 (747.8)                          | 4164.4 (603.9)                                | 4259.4 (663.0)                          | 0.797                                                          | 0.501                                                           |
| NEAAs/Conditionally EAAs |                                               |                                         |                                               |                                         |                                                                |                                                                 |
| Alanine                  | 5349.3 (989.4)                                | 5374.2 (990.5)                          | 3938.8 (569.7)                                | 4040.4 (733.9)                          | 0.799                                                          | 0.503                                                           |
| Arginine                 | 2874.7 (1038.3)                               | 3028.0 (1070.0)                         | 2145.7 (545.6)                                | 2140.4 (653.0)                          | 0.805                                                          | 0.567                                                           |
| Asx                      | 8571.5 (1329.0)                               | 8543.8 (1319.9)                         | 6219.5 (858.6)                                | 6283.7 (1039.3)                         | 0.876                                                          | 0.160                                                           |
| Glx                      | 13469.5<br>(1622.0)                           | 13502.7<br>(1655.9)                     | 11517.4<br>(1448.8)                           | 11426.8<br>(1702.5)                     | 0.505                                                          | 0.521                                                           |
| Glycine                  | 3913.7 (720.3)                                | 3888.6 (689.1)                          | 2838.8 (451.1)                                | 2921.1 (605.3)                          | 0.662                                                          | 0.130                                                           |
| Serine                   | 5125.9 (828.5)                                | 5115.5 (799.8)                          | 4062.1 (571.6)                                | 4152.9 (703.3)                          | 0.918                                                          | 0.884                                                           |
| Tyrosine                 | 1895.6 (296.7)                                | 1903.0 (298.9)                          | 1498.3 (215.0)                                | 1522.1 (238.3)                          | 0.211                                                          | 0.843                                                           |
| Sum                      |                                               |                                         |                                               |                                         |                                                                |                                                                 |
| All TAAs                 | 74.0 (11.8)                                   | 74.3 (11.9)                             | 57.9 (8.4)                                    | 58.5 (9.7)                              | 0.867                                                          | 0.473                                                           |

TAA: total amino acid; EAA: essential amino acid; NEAA: non-essential amino acid; Glx: glutamate + glutamine; Asx: aspartate + asparagine. Bonferroni-adjusted level of statistical significance is  $\alpha = 0.05/16 = 0.003$ . *P*-values < 0.003 are indicated in bold.

**Table S6A.** Adjusted model results for associations between free amino acids in human milk and infant wheeze outcomes.

| FAA                      | Wheeze                          |                                  |                                 |                                  |                                 |                                  |
|--------------------------|---------------------------------|----------------------------------|---------------------------------|----------------------------------|---------------------------------|----------------------------------|
|                          | Transient wheeze                |                                  | Persistent wheeze               |                                  | Intermediate wheeze             |                                  |
|                          | 6 weeks (n = 47)<br>RR (95% CI) | 6 months (n = 30)<br>RR (95% CI) | 6 weeks (n = 31)<br>RR (95% CI) | 6 months (n = 18)<br>RR (95% CI) | 6 weeks (n = 31)<br>RR (95% CI) | 6 months (n = 27)<br>RR (95% CI) |
| EAAs                     |                                 |                                  |                                 |                                  |                                 |                                  |
| <b>Histidine</b>         | 0.98 (0.95; 1.02)               | 1.00 (0.97; 1.03)                | 1.02 (0.98; 1.06)               | 1.02 (0.98; 1.07)                | 0.95 (0.89; 1.02)               | <b>1.04 (1.01; 1.06)*</b>        |
| <b>Isoleucine</b>        | 0.98 (0.94; 1.02)               | 1.04 (0.97; 1.11)                | 1.00 (0.97; 1.04)               | 1.01 (0.91; 1.13)                | 0.97 (0.92; 1.02)               | 1.07 (0.99; 1.14)                |
| <b>Leucine</b>           | 0.98 (0.95; 1.00)               | 1.02 (0.99; 1.05)                | 0.99 (0.96; 1.02)               | 1.02 (0.98; 1.06)                | 1.02 (1.00; 1.03)               | 1.04 (1.00; 1.09)                |
| <b>Lysine</b>            | 0.99 (0.97; 1.00)               | 1.02 (0.99; 1.05)                | 0.98 (0.97; 1.00)               | 1.00 (0.96; 1.03)                | 1.00 (0.99; 1.03)               | <b>1.04 (1.02; 1.06)*</b>        |
| <b>Methionine</b>        | 1.00 (0.98; 1.01)               | 1.00 (0.99; 1.02)                | 1.00 (0.99; 1.02)               | 1.01 (0.99; 1.02)                | 0.99 (0.97; 1.01)               | 1.02 (1.00; 1.03)                |
| <b>Phenylalanine</b>     | 0.98 (0.93; 1.03)               | 1.09 (1.03; 1.15)†               | 1.00 (0.97; 1.04)               | 1.05 (0.95; 1.16)                | 0.98 (0.93; 1.02)               | 1.04 (0.96; 1.12)                |
| <b>Threonine</b>         | 1.00 (0.98; 1.01)               | 1.00 (0.99; 1.00)                | 1.00 (0.99; 1.01)               | 1.01 (1.00; 1.02)                | 1.00 (0.98; 1.01)               | 1.01 (1.01; 1.02)†               |
| <b>Tryptophan</b>        | 0.96 (0.92; 1.01)               | 1.01 (0.98; 1.04)                | 1.02 (0.98; 1.07)               | 0.99 (0.92; 1.06)                | 0.98 (0.91; 1.04)               | 0.99 (0.96; 1.03)                |
| <b>Valine</b>            | 1.00 (0.99; 1.00)               | 1.01 (1.00; 1.03)                | 1.00 (0.99; 1.01)               | 1.00 (0.98; 1.02)                | 1.00 (0.99; 1.01)               | 1.01 (1.00; 1.02)                |
| NEAAs/conditionally EAAs |                                 |                                  |                                 |                                  |                                 |                                  |
| <b>Alanine</b>           | 1.00 (0.99; 1.01)               | 1.00 (1.00; 1.01)                | 1.00 (0.99; 1.01)               | 1.00 (0.97; 1.01)                | 1.00 (0.99; 1.01)               | 1.01 (1.00; 1.01)                |
| <b>Arginine</b>          | 0.96 (0.92; 1.00)               | 1.06 (1.00; 1.11)                | 0.97 (0.93; 1.01)               | 0.93 (0.85; 1.00)                | 1.02 (0.98; 1.07)               | 1.04 (0.98; 1.10)                |
| <b>Asparagine</b>        | 1.00 (0.98; 1.02)               | 1.00 (0.95; 1.05)                | 1.00 (0.98; 1.03)               | 0.96 (0.92; 1.00)                | <b>0.95 (0.92; 0.98)*</b>       | 1.04 (0.99; 1.11)                |

|                      |                   |                   |                   |                   |                    |                    |
|----------------------|-------------------|-------------------|-------------------|-------------------|--------------------|--------------------|
| <b>Aspartate</b>     | 1.00 (0.98; 1.02) | 0.99 (0.97; 1.00) | 1.02 (1.00; 1.05) | 1.00 (0.99; 1.02) | 0.97 (0.95; 0.99)‡ | 1.00 (0.99; 1.01)  |
| <b>Glutamate</b>     | 1.00 (1.00; 1.00) | 1.00 (1.00; 1.00) | 1.00 (1.00; 1.00) | 1.00 (1.00; 1.00) | 1.00 (1.00; 1.00)  | 1.00 (1.00; 1.00)  |
| <b>Glutamine</b>     | 1.00 (1.00; 1.00) | 1.00 (1.00; 1.00) | 1.00 (1.00; 1.00) | 1.00 (1.00; 1.00) | 1.00 (0.99; 1.00)  | 1.00 (1.00; 1.00)  |
| <b>Glycine</b>       | 1.00 (0.99; 1.01) | 1.00 (0.99; 1.01) | 1.01 (1.00; 1.02) | 1.01 (1.00; 1.02) | 0.99 (0.98; 1.00)  | 1.01 (1.00; 1.02)  |
| <b>Serine</b>        | 0.99 (0.98; 1.01) | 1.00 (0.99; 1.01) | 1.00 (1.00; 1.01) | 1.01 (1.00; 1.02) | 0.98 (0.96; 1.00)‡ | 1.01 (1.00; 1.01)‡ |
| <b>Tyrosine</b>      | 1.00 (0.98; 1.02) | 1.01 (0.97; 1.06) | 1.01 (0.99; 1.03) | 1.02 (0.93; 1.10) | 0.96 (0.94; 0.99)‡ | 1.06 (1.00; 1.12)  |
| <b>Non-coded AAs</b> |                   |                   |                   |                   |                    |                    |
| <b>Citrulline</b>    | 0.96 (0.91; 1.02) | 1.05 (0.97; 1.12) | 1.01 (0.94; 1.09) | 0.99 (0.92; 1.08) | 0.88 (0.78; 0.99)  | 1.04 (0.95; 1.14)  |
| <b>Ornithine</b>     | 0.99 (0.96; 1.02) | 0.99 (0.97; 1.01) | 1.02 (1.00; 1.04) | 1.02 (1.00; 1.03) | 0.98 (0.94; 1.02)  | 1.01 (1.01; 1.02)  |
| <b>Taurine</b>       | 1.00 (1.00; 1.00) | 1.00 (1.00; 1.00) | 1.00 (0.99; 1.00) | 1.00 (0.99; 1.01) | 1.00 (1.00; 1.01)  | 1.00 (0.99; 1.00)  |
| <b>Sum</b>           |                   |                   |                   |                   |                    |                    |
| <b>All FAAs</b>      | 1.00 (1.00; 1.00) | 1.00 (1.00; 1.00) | 1.00 (1.00; 1.00) | 1.00 (1.00; 1.00) | 1.00 (1.00; 1.00)  | 1.00 (1.00; 1.00)  |

FAA: free amino acid; EAA: essential amino acid; NEAA: non-essential amino acid; RR: risk ratio. ‡  $p < 0.01$ , \*  $p$ -value remains statistically significant following Bonferroni adjustment. Bonferroni adjusted level of statistical significance is  $\alpha = 0.05/22 = 0.0023$ .  $P$ -values  $< 0.0023$  are indicated in bold. Models were adjusted for maternal pre-pregnancy body mass index (BMI), maternal age, infant sex, maternal education and smoking status.



**Table S6B.** Adjusted model results for associations of free amino acids in human milk and infant atopic disease and lower respiratory tract infections.

| FAA                      | Atopic disease (AD)                |                                     |                                    |                                     |                                            |                                     | Lower respiratory tract infections  |                                      |
|--------------------------|------------------------------------|-------------------------------------|------------------------------------|-------------------------------------|--------------------------------------------|-------------------------------------|-------------------------------------|--------------------------------------|
|                          | Parent-reported AD                 |                                     | Paediatrician-reported AD          |                                     | Both parent- and paediatrician-reported AD |                                     |                                     |                                      |
|                          | 6 weeks<br>(n = 44)<br>RR (95% CI) | 6 months<br>(n = 27)<br>RR (95% CI) | 6 weeks<br>(n = 64)<br>RR (95% CI) | 6 months<br>(n = 37)<br>RR (95% CI) | 6 weeks<br>(n = 73)<br>RR (95% CI)         | 6 months<br>(n = 44)<br>RR (95% CI) | 6 weeks<br>(n = 151)<br>RR (95% CI) | 6 months<br>(n = 108)<br>RR (95% CI) |
| EAAs                     |                                    |                                     |                                    |                                     |                                            |                                     |                                     |                                      |
| Histidine                | 0.98 (0.95; 1.02)                  | 0.98 (0.92; 1.04)                   | 0.98 (0.95; 1.01)                  | 1.01 (0.98; 1.04)                   | 0.97 (0.93; 1.02)                          | 0.98 (0.92; 1.05)                   | 0.99 (0.96; 1.01)                   | 1.01 (1.00; 1.03)                    |
| Isoleucine               | 1.01 (0.98; 1.05)                  | 0.91 (0.78; 1.06)                   | 1.01 (0.98; 1.04)                  | 0.99 (0.91; 1.07)                   | 1.02 (0.98; 1.06)                          | 0.89 (0.72; 1.10)                   | 0.97 (0.95; 0.99)                   | 1.03 (0.99; 1.06)                    |
| Leucine                  | 1.01 (0.98; 1.03)                  | 0.93 (0.87; 1.00)                   | 1.00 (0.98; 1.02)                  | 0.97 (0.92; 1.02)                   | 1.00 (0.97; 1.04)                          | 0.92 (0.84; 1.01)                   | 1.00 (0.98; 1.01)                   | 1.01 (0.99; 1.03)                    |
| Lysine                   | 1.01 (1.00; 1.02)                  | 0.99 (0.96; 1.02)                   | 1.01 (0.99; 1.02)                  | 1.00 (0.98; 1.03)                   | 1.01 (1.00; 1.03)                          | 0.97 (0.95; 1.00)                   | 1.00 (0.99; 1.01)                   | 1.01 (1.00; 1.02)                    |
| Methionine               | 1.00 (0.98; 1.02)                  | 0.98 (0.96; 1.00)                   | 1.00 (0.98; 1.01)                  | 0.99 (0.98; 1.01)                   | 1.01 (0.99; 1.02)                          | 0.98 (0.95; 1.00)                   | 0.99 (0.98; 1.00)                   | 1.00 (0.99; 1.01)                    |
| Phenylalanine            | 1.00 (0.97; 1.04)                  | 0.95 (0.81; 1.11)                   | 0.99 (0.96; 1.02)                  | 0.96 (0.87; 1.07)                   | 1.00 (0.96; 1.04)                          | 0.95 (0.78; 1.15)                   | 1.00 (0.97; 1.04)                   | 0.98 (0.96; 1.00)                    |
| Threonine                | 1.01 (0.99; 1.02)                  | 0.98 (0.96; 1.01)                   | 1.00 (0.99; 1.02)                  | 1.00 (0.99; 1.01)                   | 1.00 (0.99; 1.02)                          | 0.98 (0.96; 1.01)                   | 0.99 (0.98; 1.00)                   | 1.00 (1.00; 1.01)                    |
| Tryptophan               | 1.04 (1.00; 1.08)                  | 1.00 (0.96; 1.04)                   | 1.02 (0.98; 1.06)                  | 1.00 (0.97; 1.04)                   | 1.04 (0.99; 1.08)                          | 1.00 (0.96; 1.05)                   | 0.99 (0.96; 1.01)                   | 0.99 (0.97; 1.02)                    |
| Valine                   | 0.99 (0.99; 1.00)                  | 0.97 (0.95; 1.00)                   | 1.00 (0.99; 1.00)                  | 0.99 (0.98; 1.01)                   | 0.99 (0.98; 1.00)                          | 0.97 (0.94; 1.01)                   | 1.00 (1.00; 1.00)                   | 1.01 (1.00; 1.02)                    |
| NEAAs/conditionally EAAs |                                    |                                     |                                    |                                     |                                            |                                     |                                     |                                      |
| Alanine                  | 1.00 (0.99; 1.00)                  | 1.00 (0.99; 1.00)                   | 1.00 (0.99; 1.00)                  | 1.00 (1.00; 1.01)                   | 1.00 (0.99; 1.00)                          | 1.00 (0.99; 1.00)                   | 1.00 (0.99; 1.00)                   | 1.00 (1.00; 1.01)                    |
| Arginine                 | 1.04 (1.00; 1.08)                  | 0.95 (0.89; 1.01)                   | 1.01 (0.97; 1.04)                  | 1.00 (0.95; 1.06)                   | 1.03 (0.98; 1.08)                          | 0.93 (0.85; 1.02)                   | 1.00 (0.98; 1.02)                   | 1.03 (1.00; 1.05)                    |
| Asparagine               | 1.00 (0.97; 1.02)                  | 0.94 (0.87; 1.01)                   | 0.99 (0.96; 1.01)                  | 0.96 (0.91; 1.02)                   | 0.99 (0.96; 1.02)                          | 0.93 (0.85; 1.01)                   | 0.98 (0.97; 1.00)                   | 1.02 (0.99; 1.04)                    |
| Aspartate                | 1.01 (0.98; 1.03)                  | 1.00 (0.99; 1.01)                   | 1.00 (0.98; 1.01)                  | 1.00 (0.99; 1.01)                   | 1.01 (0.99; 1.04)                          | 0.99 (0.98; 1.01)                   | 0.99 (0.98; 1.00)                   | 1.00 (1.00; 1.01)                    |
| Glutamate                | 1.00 (1.00; 1.00)                  | 0.99 (0.99; 0.99)†                  | 1.00 (1.00; 1.00)                  | 0.99 (0.99; 0.99)                   | 1.00 (1.00; 1.00)                          | 0.99 (0.99; 0.99)†                  | 1.00 (1.00; 1.00)                   | 1.00 (1.00; 1.00)                    |

|                      |                   |                    |                   |                   |                   |                    |                   |                   |
|----------------------|-------------------|--------------------|-------------------|-------------------|-------------------|--------------------|-------------------|-------------------|
| <b>Glutamine</b>     | 1.00 (1.00; 1.00) | 1.00 (1.00; 1.00)  | 1.00 (1.00; 1.00) | 1.00 (1.00; 1.00) | 1.00 (1.00; 1.00) | 1.00 (1.00; 1.00)  | 1.00 (1.00; 1.00) | 1.00 (1.00; 1.00) |
| <b>Glycine</b>       | 1.00 (0.99; 1.01) | 0.99 (0.97; 1.01)  | 0.99 (0.99; 1.00) | 1.00 (0.99; 1.01) | 1.00 (0.99; 1.00) | 0.99 (0.97; 1.01)  | 0.99 (0.99; 1.00) | 1.00 (1.00; 1.01) |
| <b>Serine</b>        | 1.01 (1.00; 1.02) | 1.00 (0.99; 1.01)  | 1.00 (0.99; 1.01) | 1.00 (0.99; 1.01) | 1.01 (0.99; 1.02) | 1.00 (0.99; 1.01)  | 1.00 (0.99; 1.00) | 1.00 (1.00; 1.01) |
| <b>Tyrosine</b>      | 1.01 (0.99; 1.03) | 0.91 (0.81; 1.02)  | 1.00 (0.98; 1.02) | 0.96 (0.90; 1.03) | 1.01 (0.99; 1.03) | 0.90 (0.79; 1.03)  | 0.99 (0.98; 1.00) | 1.01 (0.98; 1.03) |
| <b>Non-coded AAs</b> |                   |                    |                   |                   |                   |                    |                   |                   |
| <b>Citrulline</b>    | 1.03 (0.97; 1.10) | 0.96 (0.88; 1.05)  | 0.99 (0.92; 1.07) | 0.97 (0.90; 1.04) | 1.05 (0.96; 1.14) | 0.99 (0.89; 1.09)  | 0.97 (0.93; 1.02) | 1.00 (0.96; 1.04) |
| <b>Ornithine</b>     | 0.99 (0.95; 1.04) | 1.00 (0.99; 1.02)  | 0.98 (0.95; 1.02) | 1.01 (1.00; 1.02) | 1.00 (0.96; 1.05) | 1.00 (0.99; 1.02)  | 1.00 (0.98; 1.02) | 1.01 (1.00; 1.01) |
| <b>Taurine</b>       | 1.00 (1.00; 1.00) | 1.00 (0.99; 1.01)  | 1.00 (1.00; 1.01) | 1.00 (1.00; 1.01) | 1.00 (1.00; 1.01) | 1.00 (0.99; 1.01)  | 1.00 (1.00; 1.00) | 1.00 (1.00; 1.00) |
| <b>Sum</b>           |                   |                    |                   |                   |                   |                    |                   |                   |
| <b>All FAAs</b>      | 1.00 (1.00; 1.00) | 0.99 (0.99; 0.99)† | 1.00 (1.00; 1.00) | 1.00 (1.00; 1.00) | 1.00 (1.00; 1.00) | 0.99 (0.99; 0.99)† | 1.00 (1.00; 1.00) | 1.00 (1.00; 1.00) |

FAA: free amino acid; EAA: essential amino acid; NEAA: non-essential amino acid; RR: risk ratio. ‡  $p < 0.01$ , \*  $p$ -value remains statistically significant following Bonferroni adjustment. Bonferroni-adjusted level of statistical significance is  $\alpha = 0.05/22 = 0.002$ .  $P$ -values  $< 0.002$  are indicated in bold. Models were adjusted for maternal pre-pregnancy body mass index (BMI), maternal age, infant sex, maternal education and smoking status.

**Table S6C.** Adjusted model results for associations between free amino acids in human milk with infant food allergy.

| FAA                             | Food allergy                    |                                 |
|---------------------------------|---------------------------------|---------------------------------|
|                                 | 6 weeks (n = 13)<br>RR (95% CI) | 6 months (n = 7)<br>RR (95% CI) |
| <b>EAA</b> s                    |                                 |                                 |
| Histidine                       | 1.02 (0.80; 1.29)               | 1.00 (0.99; 1.01)               |
| Isoleucine                      | 0.99 (0.82; 1.17)               | 1.00 (0.97; 1.03)               |
| Leucine                         | 0.99 (0.86; 1.14)               | 1.00 (0.99; 1.01)               |
| Lysine                          | 0.98 (0.83; 1.15)               | 1.00 (0.99; 1.01)               |
| Methionine                      | 0.93 (0.85; 1.02)               | 1.00 (0.99; 1.01)               |
| Phenylalanine                   | 1.01 (0.86; 1.18)               | 1.00 (0.97; 1.03)               |
| Threonine                       | 0.95 (0.89; 1.03)               | 1.00 (1.00; 1.00)               |
| Tryptophan                      | 0.97 (0.78; 1.22)               | 1.00 (0.99; 1.01)               |
| Valine                          | 1.00 (0.97; 1.03)               | 1.00 (0.99; 1.01)               |
| <b>NEAA</b> s/conditionally EAA |                                 |                                 |
| Alanine                         | 0.99 (0.96; 1.02)               | 1.00 (1.00; 1.00)               |
| Arginine                        | 0.92 (0.86; 0.99)†              | 1.00 (0.98; 1.02)               |
| Asparagine                      | <b>0.70 (0.58; 0.84)*</b>       | 1.00 (0.98; 1.02)               |
| Aspartate                       | 0.97 (0.92; 1.03)               | 1.00 (1.00; 1.00)               |
| Glutamate                       | 0.94 (0.83; 1.04)               | 1.00 (1.00; 1.00)               |
| Glutamine                       | 0.85 (0.69; 1.02)               | 1.00 (1.00; 1.00)               |
| Glycine                         | 0.98 (0.94; 1.02)               | 1.00 (1.00; 1.00)               |
| Serine                          | 0.97 (0.93; 1.01)               | 1.00 (1.00; 1.00)               |
| Tyrosine                        | 0.93 (0.80; 1.07)               | 1.00 (0.98; 1.02)               |

| Non-coded AAs     |                    |                   |
|-------------------|--------------------|-------------------|
| <b>Citrulline</b> | 0.85 (0.71; 0.98)† | 1.00 (0.98; 1.03) |
| <b>Ornithine</b>  | 0.98 (0.82; 1.18)  | 1.00 (0.99; 1.01) |
| <b>Taurine</b>    | 0.99 (0.97; 1.02)  | 1.00 (1.00; 1.00) |
| <b>Sum</b>        |                    |                   |
| <b>All FAAs</b>   | 0.94 (0.84; 1.05)  | 1.00 (1.00; 1.00) |

FAA: free amino acid; EAA: essential amino acid; NEAA: non-essential amino acid; RR: risk ratio. †  $p < 0.05$ , \*  $p$ -value remains statistically significant following Bonferroni adjustment. Bonferroni-adjusted level of statistical significance is  $\alpha = 0.05/23 = 0.002$ .  $P$ -values  $< 0.002$  are indicated in bold. Models were adjusted for maternal pre-pregnancy body mass index (BMI), maternal age, infant sex, maternal education and smoking status.
